# Supplementary material for: Interfacial water structure at polymer gel/quartz interfaces investigated by sum frequency generation spectroscopy
Source: Royal Society of Chemistry journal article supplement (doi:10.1039/b807297n), 2008-01-01
Supplement: b807297n.pdf [file b807297n.pdf]

**Interfacial water structure at polymer gel/quartz interfaces investigated by sum frequency  
generation spectroscopy**

Hidenori Noguchi<sup>1</sup>, Minowa Hiroshi<sup>1</sup>, Taiki Tominaga<sup>2</sup>, Jian Ping Gong<sup>2</sup>, Yoshihito Osada<sup>3</sup> and

Kohei Uosaki<sup>1\*</sup>

*<sup>1</sup>Physical Chemistry Laboratory, Division of Chemistry, Graduate School of Science, Hokkaido  
University, Sapporo 060-0810, Japan.*

*<sup>2</sup>Laboratory of Soft and Wet Matter, Division of Biological Science, Graduate School of Science,  
Hokkaido University, Sapporo 060-0810, Japan.*

*<sup>3</sup>Molecular & Informative Life Science Unit, RIKEN, Hirosawa 2-1, Wako, Saitama, 351-0198,  
Japan.*

Corresponding author: uosaki@pcl.sci.hokudai.ac.jp

**Supplementary information**

The parameters for the fits of the SFG spectra were listed in the following tables.

**Supplementary Table S1. Parameters for the SFG spectral fits (Figure 2)**

|     | $A_1$ | $\omega_1$ | $\Gamma_1$ | $A_2$ | $\omega_2$ | $\Gamma_2$ |
|-----|-------|------------|------------|-------|------------|------------|
| (a) | 154.1 | 3200       | 150.8      | 138.2 | 3420       | 150.9      |
| (b) | 108.5 | 3200       | 150.1      | 106.7 | 3420       | 150.2      |
| (c) | 73.58 | 3200       | 150.2      | 107.1 | 3420       | 155.1      |
| (d) | 69.79 | 3200       | 150.2      | 113.4 | 3420       | 155.1      |
| (e) | 62.56 | 3200       | 151.0      | 113.4 | 3420       | 155.0      |
| (f) | 51.58 | 3200       | 155.4      | 122.6 | 3420       | 155.1      |

**Supplementary Table S2. Parameters for the SFG spectral fits (Figure 4)**

|     | $A_1$ | $\omega_1$ | $\Gamma_1$ |
|-----|-------|------------|------------|
| (a) | -     | -          | -          |
| (b) | 27.54 | 3420       | 150.0      |
| (c) | 33.51 | 3420       | 150.1      |
| (d) | 35.78 | 3420       | 150.2      |
| (e) | 40.69 | 3420       | 150.1      |

**Supplementary Table S3. Parameters for the SFG spectral fits (Figure 5)**

|          | $A_1$ | $\omega_1$ | $\Gamma_1$ | $A_2$ | $\omega_2$ | $\Gamma_2$ | $A_3$ | $\omega_3$ | $\Gamma_3$ |
|----------|-------|------------|------------|-------|------------|------------|-------|------------|------------|
| (a), (b) | 128.9 | 3200       | 150.9      | 43.59 | 3420       | 150.3      | 14.81 | 3650       | 55.18      |
| (c)      | 144.5 | 3200       | 150.0      | 32.19 | 3420       | 150.7      | -     | -          | -          |
| (d)      | 136.5 | 3200       | 150.8      | 28.58 | 3420       | 150.8      | -     | -          | -          |
| (e)      | 124.9 | 3200       | 150.8      | 25.11 | 3420       | 150.9      | -     | -          | -          |
| (f)      | 120.7 | 3200       | 154.9      | 15.66 | 3420       | 150.2      | -     | -          | -          |

**Supplementary Table S4. Parameters for the SFG spectral fits (Figure 6)**

|     | $A_1$ | $\omega_1$ | $\Gamma_1$ | $A_2$ | $\omega_2$ | $\Gamma_2$ | $A_3$ | $\omega_3$ | $\Gamma_3$ |
|-----|-------|------------|------------|-------|------------|------------|-------|------------|------------|
| (a) | 300   | 3200       | 157.9      | 114.0 | 3420       | 158.1      | -     | -          | -          |
| (b) | 150.5 | 3200       | 157        | 75.79 | 3420       | 157        | 6.37  | 3650       | 15         |

**Supplementary Table S5. Parameters for the SFG spectral fits (Figure 7)**

|     | $A_1$ | $\omega_1$ | $\Gamma_1$ | $A_2$ | $\omega_2$ | $\Gamma_2$ |
|-----|-------|------------|------------|-------|------------|------------|
| (a) | 380   | 3200       | 150        | 107.8 | 3420       | 150.0      |
| (b) | 167.0 | 3200       | 150.1      | 100.9 | 3420       | 150.0      |
